# Supplementary material for: Pharmaceutical Development of Nanostructured Vesicular Hydrogel Formulations of Rifampicin for Wound Healing
Source: MDPI journal article supplement (doi:10.3390/ijms232416207), 2022-12-19
Supplement: s1 [file s1]

Supplementary Materials to the article:

# Pharmaceutical Development of Nanostructured Vesicular Hydrogel Formulations of Rifampicin for Wound Healing

Chantal M. Wallenwein <sup>1</sup>, Verena Weigel <sup>2</sup>, Götz Hofhaus <sup>3</sup>, Namrata Dhakal <sup>4</sup>, Wolfgang Schatton<sup>5</sup>, Svetlana Gelperina <sup>6</sup>, Florian K. Groeber-Becker <sup>2</sup>, Jennifer Dressman <sup>1</sup> and Matthias G. Wacker <sup>4,\*</sup>

<sup>1</sup> Fraunhofer Institute for Translational Medicine and Pharmacology ITMP, Theodor-Stern-Kai 7, 60596 Frankfurt am Main, Germany

<sup>2</sup> Translational Center for Regenerative Therapies, Fraunhofer Institute for Silicate Research ISC, Neunerplatz 2, 97082 Würzburg, Germany

<sup>3</sup> Cryo Electron Microscopy, CellNetworks, BioQuant, Universitätsklinikum Heidelberg, 69120 Heidelberg, Germany

<sup>4</sup> Department of Pharmacy, Faculty of Science, National University of Singapore, 4 Science Drive 2, Singapore 117544, Singapore

<sup>5</sup> Klinipharma GmbH, Hauptstraße 23, 65760 Eschborn, Germany

<sup>6</sup> Faculty of Chemical and Pharmaceutical Technologies and Biomedical Drugs, D. Mendeleev University of Chemical Technology of Russia, Miusskaya pl. 9, 125047 Moscow, Russia

\* Correspondence: matthias.g.wacker@nus.edu.sg

**Table S1:** Process parameters during the freeze-drying process of liposomal HPMC gel.

| Name                                        | Duration<br>[hh:mm] | Time<br>[hh:mm] | Vacuum pressure<br>[mbar] | Temperature<br>[°C] |
|---------------------------------------------|---------------------|-----------------|---------------------------|---------------------|
| <b>Freezing</b><br>(Load at end of section) | 01:00               | 01:00           | 1024                      | -60                 |
| <b>Freezing</b>                             | 02:30               | 03:30           | 1024                      | -60                 |
| <b>Primary Drying</b>                       | 01:00               | 04:30           | 0.94                      | -30                 |
|                                             | 05:00               | 09:30           | 0.006                     | -10                 |
|                                             | 31:00               | 40:30           | 0.006                     | -10                 |
| <b>Secondary Drying</b>                     | 00:30               | 41:00           | 0.006                     | 10                  |
|                                             | 10:00               | 51:00           | 0.006                     | 20                  |
|                                             | 4:00                | 55:00           | 1.024                     | 20                  |

**Table S2:** Process parameters during the final freeze-drying process of liposomal hyaluronic acid-collagen gel.

| Name                                        | Duration<br>[hh:mm] | Time<br>[hh:mm] | Vacuum pressure<br>[mbar] | Temperature<br>[°C] |
|---------------------------------------------|---------------------|-----------------|---------------------------|---------------------|
| <b>Freezing</b><br>(Load at end of section) | 01:00               | 01:00           | 1024                      | -60                 |
| <b>Freezing</b>                             | 02:30               | 03:30           | 1024                      | -60                 |
| <b>Primary Drying</b>                       | 01:00               | 04:30           | 0.94                      | -60                 |
|                                             | 02:00               | 06:30           | 0.94                      | -60                 |
|                                             | 01:00               | 07:30           | 0.52                      | -60                 |
|                                             | 03:00               | 10:30           | 0.52                      | -60                 |
|                                             | 01:00               | 11:30           | 0.20                      | -60                 |
|                                             | 05:00               | 16:30           | 0.20                      | -60                 |
|                                             | 01:00               | 17:30           | 0.07                      | -60                 |
|                                             | 10:00               | 27:30           | 0.07                      | -60                 |
|                                             | 30:00               | 57:30           | 0.07                      | -55                 |
|                                             | 20:00               | 77:30           | 0.07                      | -50                 |
|                                             | 20:00               | 97:30           | 0.07                      | -45                 |
|                                             | 20:00               | 117:30          | 0.07                      | -40                 |
|                                             | 20:00               | 137:30          | 0.07                      | -35                 |
|                                             | 20:00               | 157:30          | 0.07                      | -30                 |
|                                             | 20:00               | 177:30          | 0.07                      | -25                 |
|                                             | 20:00               | 197:30          | 0.07                      | -20                 |
|                                             | 20:00               | 207:30          | 0.07                      | -10                 |
|                                             | 10:00               | 217:30          | 0.07                      | -10                 |
| <b>Secondary Drying</b>                     | 05:00               | 222:30          | 0.006                     | 10                  |
|                                             | 10:00               | 232:30          | 0.006                     | 20                  |
|                                             | 4:00                | 236:30          | 1.024                     | 20                  |
